# Supplementary material for: NiFe2O4nanoparticles decorated with MWCNTs as a selective and sensitive electrochemical sensor for the determination of epinephrine using differential pulse voltammetry
Source: Royal Society of Chemistry journal article supplement (doi:10.1039/c4ay01232a), 2014-01-01

## Name and formula

Reference code: 01-074-2081  
ICSD name: Nickel Iron Oxide  
Empirical formula:  $\text{Fe}_2\text{NiO}_4$   
Chemical formula:  $\text{NiFe}_2\text{O}_4$

## Crystallographic parameters

Crystal system: Cubic  
Space group: Fd-3m  
Space group number: 227  
a (Å): 8.3379  
b (Å): 8.3379  
c (Å): 8.3379  
Alpha (°): 90.0000  
Beta (°): 90.0000  
Gamma (°): 90.0000  
Calculated density: 5.37  
Volume of cell: 579.66  
Z: 8.00  
RIR: 4.83

## Subfiles and Quality

Subfiles: Inorganic  
Corrosion  
Modelled additional pattern  
Quality: Calculated (C)

## Comments

ICSD collection code: 028108  
Test from ICSD: No R value given.  
At least one TF missing.

## References

Primary reference: *Calculated from ICSD using POWD-12++*, (1997)  
Structure: Subramanyam, K.N., *J. Phys. C: Solid State Phys.*, **4**, 2266, (1971)

## Peak list

| No. | h | k | l | d [Å]   | 2Theta [deg] | I [%] |
|-----|---|---|---|---------|--------------|-------|
| 1   | 1 | 1 | 1 | 4.81389 | 18.416       | 11.4  |
| 2   | 2 | 2 | 0 | 2.94789 | 30.295       | 29.9  |
| 3   | 3 | 1 | 1 | 2.51397 | 35.686       | 100.0 |

|    |   |   |   |         |        |      |
|----|---|---|---|---------|--------|------|
| 4  | 2 | 2 | 2 | 2.40694 | 37.330 | 7.4  |
| 5  | 4 | 0 | 0 | 2.08448 | 43.375 | 20.2 |
| 6  | 3 | 3 | 1 | 1.91285 | 47.494 | 0.5  |
| 7  | 4 | 2 | 2 | 1.70197 | 53.820 | 8.1  |
| 8  | 5 | 1 | 1 | 1.60463 | 57.377 | 26.1 |
| 9  | 4 | 4 | 0 | 1.47395 | 63.015 | 33.1 |
| 10 | 5 | 3 | 1 | 1.40936 | 66.263 | 0.8  |
| 11 | 4 | 4 | 2 | 1.38965 | 67.327 | 0.1  |
| 12 | 6 | 2 | 0 | 1.31834 | 71.506 | 2.4  |
| 13 | 5 | 3 | 3 | 1.27152 | 74.574 | 5.9  |
| 14 | 6 | 2 | 2 | 1.25699 | 75.586 | 2.3  |
| 15 | 4 | 4 | 4 | 1.20347 | 79.593 | 1.9  |
| 16 | 7 | 1 | 1 | 1.16754 | 82.564 | 0.4  |
| 17 | 6 | 4 | 2 | 1.11420 | 87.474 | 2.3  |

### Stick Pattern

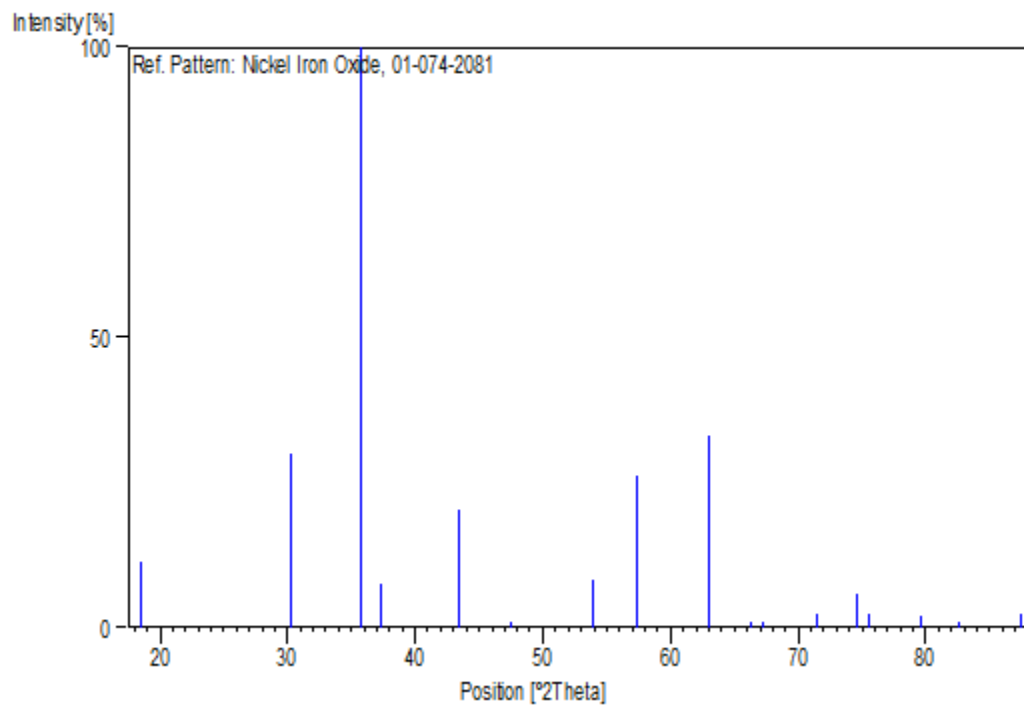

Supplement: c4ay01232a1.pdf [file c4ay01232a1.pdf]
